# Supplementary material
Source: publisher site journal article supplement (https://www.spandidos-publications.com/4657/downloadSupplementary)
Supplement: Supplementary file 1 [file downloadSupplementary]

## Sheet: Sheet1
Table SVII. Results of KEGG functional enrichment analysis.
Category	Term	Count	%	PValue	Genes	List Total	Pop Hits	Pop Total	Fold Enrichment	Bonferroni	Benjamini	FDR
KEGG_PATHWAY	Cell cycle	70	1.455	9.02159e-12	CDKN1C, RB1, GSK3B, CDKN1B, MCM7, CCNH, CDC14B, CDC20, PTTG1, YWHAQ, CHEK2, CHEK1, SKP2, YWHAG, SKP1, CDC25C, YWHAZ, CDC25A, CDC25B, SMC1B, CCNA2, RBL1, TFDP1, CCNE2, ESPL1, TFDP2, CCNE1, MCM3, MCM4, MCM5, MCM6, ANAPC1, MAD1L1, MCM2, ANAPC13, HDAC2, PCNA, PRKDC, CUL1, TTK, PKMYT1, ANAPC11, ORC5, CCNB2, CCNB1, ORC6, CDC45, ORC1, RAD21, E2F2, E2F3, SFN, E2F4, E2F5, BUB1, CDKN2D, CREBBP, CDKN2C, TGF…	1852	124	6879	2.09682	2.6794e-09	2.67941e-09	2.508e-09
KEGG_PATHWAY	Oocyte meiosis	59	1.22636	1.0116e-08	CALML5, CALML3, IGF1R, CDC20, PPP3CB, PPP3CC, PTTG1, YWHAQ, RPS6KA2, FBXO5, BTRC, YWHAG, SKP1, MAP2K1, PPP2R5A, PPP2R5D, PPP2R5C, CDC25C, YWHAZ, SMC1B, SGO1, AR, ADCY9, CCNE2, ESPL1, CCNE1, PGR, ANAPC1, CAMK2B, ANAPC13, CUL1, ADCY4, ITPR1, ITPR2, ITPR3, ADCY1, PKMYT1, ADCY7, AURKA, ANAPC11, PPP2CA, CCNB2, PPP3R1, CCNB1, MAPK1, BUB1, MAPK3, SPDYC, PLK1, IGF1, REC8, PPP1CA, MAD2L2, CPEB1, CDK2, CDK…	1852	111	6879	1.9743	3.00444e-06	1.50222e-06	1.40612e-06
KEGG_PATHWAY	DNA replication	27	0.561214	1.74424e-08	PRIM2, FEN1, RNASEH2A, PCNA, MCM7, PRIM1, POLD3, RNASEH1, POLD1, POLD2, POLE, RFC5, RFC3, RFC4, LIG1, RFC2, POLA1, POLA2, POLE2, POLE3, MCM3, MCM4, MCM5, MCM6, SSBP1, DNA2, MCM2	1852	36	6879	2.78577	5.18038e-06	1.7268e-06	1.61633e-06
KEGG_PATHWAY	Pyrimidine metabolism	49	1.0185	6.49434e-06	CDA, NUDT2, PNP, TK2, TK1, UPP1, POLE, ENTPD3, ENTPD5, CAD, NME3, ENTPD8, CTPS1, DCK, NME1, DCTD, NME7, POLR1C, CMPK2, PRIM2, DTYMK, PRIM1, TYMS, NT5C2, AK9, TYMP, POLD3, POLR2A, POLD1, POLD2, POLR2D, POLR2F, POLR2G, POLR2H, POLR2J, POLR2L, DUT, RRM1, RRM2, POLR3GL, UCKL1, DHODH, POLA1, UCK2, POLA2, POLR3A, POLE2, POLE3, POLR3G	1852	101	6879	1.80202	0.00192697	0.000482205	0.000451357
KEGG_PATHWAY	Gap junction	41	0.852214	0.000130581	SRC, ADCY4, GNAI3, HTR2B, LPAR1, ITPR1, ITPR2, ITPR3, ADCY1, ADCY7, TUBB8, TUBA3E, TUBA1C, TUBA1B, GJA1, NRAS, TUBA3D, TUBA1A, TUBA3C, TUBB3, PDGFD, PDGFC, MAPK1, HRAS, MAP2K5, MAPK3, PDGFRB, MAP2K1, TUBB, CSNK1D, TUBB4B, TUBA4A, TJP1, PLCB4, ADCY9, CDK1, GNAS, GRB2, KRAS, RAF1, SOS1	1852	88	6879	1.73056	0.0380427	0.00775653	0.00726032
KEGG_PATHWAY	Purine metabolism	70	1.455	0.00021709	NUDT2, NUDT5, ATIC, PNP, GUK1, PPAT, PDE4A, ENPP4, NUDT16, PDE8B, PDE8A, POLE, ADSL, ENTPD3, ENTPD5, NME3, ENTPD8, DCK, NME1, APRT, ADCY9, NME7, POLR1C, PDE5A, HPRT1, ADPRM, GART, PRPS2, PRIM2, PDE1A, NPR2, PRIM1, GMPR2, GMPS, ADCY4, GMPR, AK3, AK5, ADCY1, NT5C2, ADCY7, AK8, AK9, POLD3, POLR2A, POLD1, POLD2, POLR2D, POLR2F, PDE6B, POLR2G, POLR2H, POLR2J, POLR2L, RRM1, RRM2, POLR3GL, PDE2A, PAICS,…	1852	176	6879	1.4773	0.0624476	0.00955095	0.00893995
KEGG_PATHWAY	Carbon metabolism	49	1.0185	0.000225107	GPI, GLDC, ADPGK, ENO1, HK3, MCEE, ME1, PHGDH, ME3, ACADM, ME2, PSPH, G6PD, SDS, TPI1, GPT2, AMT, TALDO1, PGD, PCCA, CAT, SUCLG2, IDNK, TKT, FBP1, GAPDH, PRPS2, H6PD, SHMT2, PDHB, ACAT2, ACAT1, ESD, PGK1, PDHA1, MDH1, GOT1, MDH2, IDH2, MTHFR, RPIA, GLUD1, PFKL, ALDH6A1, SUCLA2, CPS1, PSAT1, ACO1, PFKP	1852	113	6879	1.61065	0.0646778	0.00955095	0.00893995
KEGG_PATHWAY	Proteasome	24	0.498857	0.00029804	PSMD12, PSMD11, PSMD14, POMP, PSMA7, PSMB9, PSMA5, PSMB7, PSMA3, PSMB4, PSMD7, PSMA4, PSMB5, IFNG, PSMC3, PSMB2, PSMB3, PSMD2, PSMC2, PSMD3, PSMB1, PSME4, PSMD1, PSME2	1852	44	6879	2.02602	0.0847254	0.0110648	0.0103569
KEGG_PATHWAY	Spliceosome	55	1.14321	0.000375333	TCERG1, EIF4A3, USP39, PQBP1, EFTUD2, SNRPD2, SNRNP70, SNRPD1, MAGOH, DHX16, CTNNBL1, NCBP1, NCBP2, BUD31, THOC3, WBP11, PRPF4, SYF2, SRSF2, SNRPG, PPIH, SNRPA1, SRSF5, SNRPF, SNRPC, SNRNP200, SRSF7, SLU7, SRSF8, SNRPA, RBM22, SNRPB, SF3B2, SF3B3, SRSF1, DDX23, U2AF1, PUF60, U2AF2, DHX38, SNRPB2, PPIL1, CCDC12, ALYREF, HSPA2, LSM5, LSM4, U2SURP, CHERP, LSM2, XAB2, LSM7, PHF5A, HNRNPK, PRPF31	1852	133	6879	1.53601	0.105504	0.012386	0.0115936
KEGG_PATHWAY	Bladder cancer	22	0.457285	0.000772125	RB1, MAP2K1, CXCL8, CDKN2A, DAPK1, MMP1, SRC, MMP2, BRAF, MMP9, TYMP, VEGFA, NRAS, RPS6KA5, CDK4, E2F2, MAPK1, KRAS, E2F3, RAF1, HRAS, MAPK3	1852	41	6879	1.99307	0.204997	0.0229321	0.0214651
KEGG_PATHWAY	Biosynthesis of antibiotics	79	1.64207	0.000873935	GPI, GLDC, ADPGK, TAT, ENO1, GCSH, HK3, NSDHL, ATIC, PPAT, PHGDH, ACADM, HMGCS2, ACAA1, AASS, PSPH, ADSL, G6PD, SDS, TPI1, HMGCS1, BCKDHB, AMT, NME3, TALDO1, CMBL, PGD, LSS, NME1, ALDH3A2, PCCA, NME7, CAT, SUCLG2, MVD, IDNK, TKT, FBP1, GAPDH, GART, BCAT2, ALDH9A1, PRPS2, MVK, SHMT2, FAXDC2, ODC1, AK3, PDHB, AK5, HSD17B7, PLA2G7, HSD17B10, ACAT2, AK8, ACAT1, AK9, LDHB, LDHA, PGK1, SC5D, RCE1, FDPS…	1852	212	6879	1.38413	0.228696	0.0235962	0.0220867
KEGG_PATHWAY	Progesterone-mediated oocyte maturation	38	0.789857	0.00110717	ANAPC13, HSP90AB1, ADCY4, GNAI3, ADCY1, PIK3R1, PKMYT1, ADCY7, ANAPC11, IGF1R, CCNB2, CCNB1, RPS6KA2, MAPK1, BUB1, MAPK3, MAP2K1, SPDYC, PLK1, BRAF, IGF1, CDC25C, CDC25A, CDC25B, MAD2L2, CCNA2, CPEB1, ADCY9, CDK2, CDK1, KRAS, PGR, CPEB3, RAF1, CPEB2, ANAPC1, MAD1L1, MAD2L1	1852	87	6879	1.62237	0.280366	0.0274026	0.0256495
KEGG_PATHWAY	Glyoxylate and dicarboxylate metabolism	16	0.332571	0.00150871	MDH1, SHMT2, GLDC, MDH2, AMT, HOGA1, ACAT2, ACAT1, GCSH, MCEE, PCCA, AFMID, CAT, HYI, ACO1, GLUL	1852	27	6879	2.2011	0.361367	0.0344682	0.0322632
KEGG_PATHWAY	Pathways in cancer	132	2.74371	0.00220377	RB1, FGF1, FGF2, IGF1R, EDNRA, EDNRB, SKP2, PDGFRB, MAP2K1, DAPK1, WNT5A, MITF, RUNX1, MSH6, AR, ADCY9, MSH2, CCNE2, MSH3, CCNE1, COL4A6, AGTR1, COL4A5, RAF1, EPAS1, CUL2, LPAR1, LPAR2, PIK3R1, STK4, HSP90B1, DVL3, PLCG1, FZD1, STAT5B, CREBBP, JUN, WNT10A, FZD4, TGFB3, ZBTB16, FZD9, FZD8, BRAF, IGF1, GNG12, GNG11, PTK2, NFKB1, BMP4, CXCL12, LPAR6, CDK4, FGF18, CDK2, BCL2, GNB4, GNAS, GRB2, GNB5, …	1852	393	6879	1.24757	0.480684	0.0446007	0.0417475
KEGG_PATHWAY	HTLV-I infection	90	1.87071	0.00225256	RB1, GSK3B, NRP1, TRRAP, ITGB2, SLC2A1, CD3G, TNFRSF13C, CD3D, ELK1, TNF, ETS2, ELK4, CDC20, IKBKB, PPP3CB, ZFP36, PPP3CC, XPO1, PTTG1, CHEK2, CHEK1, MYB, TSPO, HLA-DOB, POLE, HRAS, JAK1, PDGFRB, MAP2K4, IL1R2, WNT5A, FOS, HLA-F, HLA-G, TGFBR2, ADCY9, LCK, LTA, VDAC3, TBPL1, VDAC2, SLC25A5, ANAPC1, VAC14, PCNA, ADCY4, PIK3R1, ADCY1, IL2RG, ADCY7, ANAPC11, POLD3, NRAS, PPP3R1, WNT11, POLD1, TP53IN…	1852	254	6879	1.31611	0.488171	0.0446007	0.0417475
KEGG_PATHWAY	Mismatch repair	14	0.291	0.00253303	RFC5, RFC3, RFC4, PCNA, LIG1, RFC2, MSH6, POLD3, MSH2, EXO1, MSH3, POLD1, POLD2, SSBP1	1852	23	6879	2.26092	0.529173	0.0460319	0.0430871
KEGG_PATHWAY	Valine, leucine and isoleucine degradation	23	0.478071	0.00263483	ACAD8, HMGCS1, BCKDHB, MCCC1, ABAT, ACADSB, ACSF3, HSD17B10, ACAT2, ACAT1, ALDH3A2, HMGCL, ALDH6A1, MCEE, AUH, PCCA, IVD, AOX1, ACADM, HMGCS2, ACAA1, BCAT2, ALDH9A1	1852	47	6879	1.81767	0.54323	0.0460319	0.0430871
KEGG_PATHWAY	Hepatitis B	55	1.14321	0.003829	RB1, CDKN1B, CXCL8, PTEN, ELK1, TNF, IFIH1, IKBKB, YWHAQ, CREB3L4, CASP3, IKBKE, HRAS, JAK1, MAP2K4, MAP2K1, TICAM2, FOS, MMP9, YWHAZ, CCNA2, CCNE2, CCNE1, IRF7, VDAC3, BIRC5, RAF1, TLR3, IFNAR1, PCNA, SRC, PIK3R1, NRAS, E2F2, MAPK1, E2F3, STAT6, MAPK3, STAT5B, JUN, CREBBP, EGR3, MAP3K1, TGFB3, STAT1, STAT3, NFATC3, NFKB1, CDK4, CDK2, BCL2, BAX, KRAS, GRB2, MYD88	1852	145	6879	1.4089	0.679987	0.0631784	0.0591367
KEGG_PATHWAY	Base excision repair	17	0.353357	0.00644458	PARP3, FEN1, PCNA, LIG1, PARP2, APEX2, UNG, POLD3, NEIL3, POLD1, POLE2, TDG, POLD2, POLE3, NEIL1, POLE, MUTYH	1852	33	6879	1.91346	0.853427	0.100739	0.0942944
KEGG_PATHWAY	RNA degradation	32	0.665142	0.00721879	BTG3, BTG2, DIS3L, ENO1, HSPD1, EDC4, EXOSC5, EXOSC4, EXOSC9, DHX36, NUDT16, DCPS, EXOSC2, EXOSC1, TTC37, PABPC4, LSM1, LSM5, LSM4, PATL1, LSM2, PAN2, PFKL, LSM7, PAN3, CNOT1, CNOT3, PABPC1, CNOT8, CNOT9, PFKP, DCP1B	1852	77	6879	1.54363	0.88372	0.107199	0.100341
KEGG_PATHWAY	Ribosome biogenesis in eukaryotes	35	0.727499	0.00860535	RBM28, POP7, NXT1, POP1, HEATR1, NAT10, WDR43, RRP7A, FBL, EMG1, XPO1, BMS1, GAR1, DROSHA, RIOK1, RPP38, NOP56, UTP6, NOP58, REXO1, CSNK2A1, UTP4, IMP3, RPP40, CSNK2A2, IMP4, GNL2, GTPBP4, EIF6, DKC1, CSNK2B, NHP2, MPHOSPH10, RPP25, NOP10	1852	87	6879	1.49428	0.923223	0.121704	0.113919
KEGG_PATHWAY	Prion diseases	17	0.353357	0.00918371	C1QB, EGR1, C1QA, MAP2K1, HSPA5, ELK1, SOD1, STIP1, C5, C6, C7, CCL5, BAX, MAPK1, NCAM2, C1QC, MAPK3	1852	34	6879	1.85718	0.93544	0.12398	0.116049
KEGG_PATHWAY	T cell receptor signaling pathway	39	0.810642	0.00963267	GSK3B, ITK, CD3G, PIK3R1, CD3D, TNF, IKBKB, PPP3CB, NRAS, PPP3R1, PPP3CC, NCK2, CTLA4, MAPK1, PLCG1, ICOS, MAP2K7, HRAS, NCK1, MAPK3, PAK4, JUN, MAP2K1, NFATC3, FOS, NFKB1, CD4, IFNG, LCK, CDK4, GRB2, KRAS, PRKCQ, PDCD1, CD247, RAF1, SOS1, CARD11, NFKBIB	1852	100	6879	1.4486	0.943571	0.124387	0.11643
KEGG_PATHWAY	Cysteine and methionine metabolism	18	0.374143	0.0133753	MPST, DNMT1, AHCYL1, SDS, AHCY, GOT1, MDH1, MDH2, TAT, AMD1, SRM, LDHB, LDHA, MTAP, SMS, DNMT3B, CDO1, ENOPH1	1852	38	6879	1.75944	0.981671	0.16552	0.154931
KEGG_PATHWAY	Herpes simplex infection	64	1.33028	0.0139929	TNF, IFIH1, IKBKB, CASP3, SKP2, HLA-DOB, IKBKE, JAK1, SKP1, IFNAR2, CSNK2A1, CSNK2A2, MED8, TAP2, TAP1, TRAF2, FOS, HLA-F, HLA-G, HCFC1, TAF6L, CDC34, IFNG, OAS1, TRAF3, OAS2, TRAF5, CSNK2B, SRSF2, IRF7, LTA, TBPL1, SRSF5, SRSF7, SRSF8, TLR3, IFNAR1, SRSF1, CUL1, C5, POLR2A, CCL5, TNFRSF14, JUN, CREBBP, TAF13, STAT1, ALYREF, EIF2AK2, PILRA, NFKB1, SRPK1, PPP1CA, PER2, PER3, HNRNPK, CDK2, CDK1, GT…	1852	183	6879	1.29901	0.984782	0.166236	0.155602
KEGG_PATHWAY	Fanconi anemia pathway	23	0.478071	0.014703	MUS81, TOP3B, FANCI, BLM, RMI2, CENPX, POLN, RMI1, TOP3A, REV1, FAAP24, FANCC, BRCA1, FANCB, FANCE, FANCG, RAD51, RAD51C, EME1, FANCD2, UBE2T, ERCC1, USP1	1852	53	6879	1.61189	0.987713	0.167954	0.157209
KEGG_PATHWAY	mRNA surveillance pathway	35	0.727499	0.0181926	DAZAP1, NXT1, CSTF3, CSTF2, EIF4A3, CSTF2T, PPP2R2A, MSI1, SMG7, SMG5, GSPT1, PPP2CA, PABPN1, PCF11, CLP1, MAGOH, CSTF1, SAP18, CPSF4, RNGTT, CPSF6, CPSF1, NCBP1, NCBP2, ALYREF, CPSF3, PABPC4, SSU72, PPP2R5A, UPF3B, PPP2R3B, PPP2R5D, PPP2R5C, PPP1CA, PABPC1	1852	91	6879	1.4286	0.995716	0.198226	0.185545
KEGG_PATHWAY	Prostate cancer	34	0.706714	0.018688	RB1, GSK3B, CDKN1B, HSP90AB1, LEF1, PTEN, PIK3R1, HSP90B1, IGF1R, IKBKB, NRAS, CREB3L4, PDGFD, PDGFC, E2F2, MAPK1, E2F3, HRAS, MAPK3, PDGFRB, MAP2K1, CREBBP, BRAF, IGF1, NFKB1, AR, CCNE2, CCNE1, CDK2, BCL2, GRB2, KRAS, RAF1, SOS1	1852	88	6879	1.43509	0.996313	0.198226	0.185545
KEGG_PATHWAY	One carbon pool by folate	11	0.228643	0.0230715	DHFR, ALDH1L1, ATIC, MTHFD1, MTHFD1L, SHMT2, MTHFD2, AMT, MTHFR, TYMS, GART	1852	20	6879	2.0429	0.999024	0.236284	0.221168
KEGG_PATHWAY	Homologous recombination	14	0.291	0.0284266	MUS81, TOP3B, BLM, TOP3A, XRCC3, RAD54B, POLD3, RAD51, RAD51C, EME1, POLD1, POLD2, RAD54L, SSBP1	1852	29	6879	1.79314	0.999809	0.269098	0.251883
KEGG_PATHWAY	Acute myeloid leukemia	23	0.478071	0.0289959	STAT5B, MAP2K1, ZBTB16, LEF1, STAT3, BRAF, PIK3R1, NFKB1, RUNX1, IKBKB, NRAS, RPS6KB2, EIF4EBP1, MAPK1, GRB2, KRAS, PIM2, RAF1, SOS1, HRAS, PPARD, MAPK3, RUNX1T1	1852	56	6879	1.52554	0.99984	0.269098	0.251883
KEGG_PATHWAY	hsa01100:Metabolic pathways	356	7.39971	0.0298261	DMGDH, PI4K2B, CDA, PANK2, AHCYL1, CMAS, PANK1, GLDC, ABAT, ACSM5, ENO1, GCSH, NSDHL, PNP, SCP2, TDO2, FLAD1, PPAT, CKMT1B, SEPHS1, GLUL, XYLB, GAMT, ACOT8, ATP6V1G2, SDS, PHYKPL, GLCE, MCCC1, ALG2, TALDO1, ALG3, MOGS, CMBL, CEL, HOGA1, INPP4A, INPP4B, MTAP, BTD, MTHFD1, CYP2U1, MTHFD2, SUCLG2, ACOT1, IDNK, HPRT1, PLPP3, ACOT4, PLPP1, IDO1, CES1, LIPT1, MAOA, SHMT2, FAXDC2, RPN1, LIAS, MTMR4, PLA…	1852	1219	6879	1.08475	0.999876	0.269098	0.251883
KEGG_PATHWAY	hsa00250:Alanine, aspartate and glutamate metabolism	16	0.332571	0.0298998	ADSL, GOT1, GLS2, GPT2, GAD1, CAD, ASNS, ABAT, DDO, ASS1, GLUD1, FOLH1, CPS1, PPAT, GLUL, ASPA	1852	35	6879	1.69799	0.999879	0.269098	0.251883
KEGG_PATHWAY	hsa04360:Axon guidance	44	0.914571	0.0486445	SEMA5A, GSK3B, NRP1, SEMA7A, SEMA3C, SEMA3B, NTN4, GNAI3, SEMA3G, SEMA3E, PPP3CB, NRAS, PPP3R1, PPP3CC, ABLIM2, ABLIM3, NCK2, MAPK1, PLXNA1, RAC3, SLIT3, SLIT2, SRGAP3, SRGAP2, LRRC4C, HRAS, PLXNA3, NCK1, MAPK3, PAK4, ARHGEF12, SEMA6A, SEMA4D, LIMK2, SEMA6D, LIMK1, NFATC3, PTK2, CXCL12, RASA1, PLXNB3, KRAS, PLXNB1, EPHA3	1852	127	6879	1.28687	1	0.412789	0.386382
KEGG_PATHWAY	hsa05214:Glioma	25	0.519642	0.04877	RB1, CAMK2B, SHC2, CALML5, PTEN, CALML3, PIK3R1, IGF1R, NRAS, E2F2, MAPK1, E2F3, PLCG1, HRAS, MAPK3, PDGFRB, MAP2K1, CDKN2A, BRAF, IGF1, CDK4, GRB2, KRAS, RAF1, SOS1	1852	65	6879	1.4286	1	0.412789	0.386382
KEGG_PATHWAY	hsa04068:FoxO signaling pathway	46	0.956142	0.0506267	CDKN1B, IRS1, PTEN, IRS2, PIK3R1, STK4, GABARAP, IGF1R, IKBKB, CCNB2, NRAS, CCNB1, BCL2L11, TNFSF10, S1PR1, MAPK1, HOMER3, SKP2, HRAS, MAPK3, CDKN2D, PLK4, MAP2K1, CREBBP, TGFB3, PRMT1, PLK2, PLK1, STAT3, BRAF, IGF1, SOD2, SIRT1, PRKAB1, KLF2, TGFBR2, GADD45G, BCL6, CCNG2, CAT, CDK2, GRB2, KRAS, SGK3, RAF1, SOS1	1852	134	6879	1.27508	1	0.412789	0.386382
KEGG_PATHWAY	hsa04662:B cell receptor signaling pathway	26	0.540428	0.0557535	GSK3B, PIK3R1, IKBKB, PPP3CB, NRAS, PPP3R1, PPP3CC, CD19, MAPK1, RAC3, HRAS, MAPK3, LYN, JUN, MAP2K1, CD72, SYK, NFATC3, FOS, NFKB1, GRB2, KRAS, RAF1, SOS1, CARD11, NFKBIB	1852	69	6879	1.39961	1	0.412789	0.386382
KEGG_PATHWAY	hsa00330:Arginine and proline metabolism	20	0.415714	0.0565983	GAMT, AOC1, CKM, GOT1, MAOA, SMOX, AMD1, ODC1, PYCR1, AZIN2, SAT2, HOGA1, SRM, AGMAT, ALDH3A2, CKMT2, GATM, SMS, CKMT1B, ALDH9A1	1852	50	6879	1.48575	1	0.412789	0.386382
KEGG_PATHWAY	hsa04919:Thyroid hormone signaling pathway	40	0.831428	0.0569385	GSK3B, HDAC2, THRA, SRC, ATP1A4, SLC2A1, ATP1A2, PIK3R1, ACTB, SLC9A1, NRAS, RXRA, MED30, MAPK1, ITGAV, PLCG1, HRAS, MAPK3, NCOA1, MAP2K1, CREBBP, STAT1, NCOA3, DIO1, ATP1B3, SLC16A10, ATP1B1, MED27, ESR1, MED13L, BMP4, NCOR1, PLCB4, RHEB, RCAN2, KRAS, PLCD3, RAF1, PLCD4, PLCD1	1852	115	6879	1.29195	1	0.412789	0.386382
KEGG_PATHWAY	hsa04720:Long-term potentiation	25	0.519642	0.0577254	CAMK2B, GRIA2, CALML5, ITPR1, ITPR2, CALML3, ITPR3, CACNA1C, ADCY1, PPP3CB, NRAS, PPP3R1, PPP3CC, RPS6KA2, MAPK1, HRAS, MAPK3, MAP2K1, CREBBP, BRAF, PPP1CA, PLCB4, KRAS, RAF1, RAPGEF3	1852	66	6879	1.40696	1	0.412789	0.386382
KEGG_PATHWAY	hsa03420:Nucleotide excision repair	19	0.394928	0.0581155	RFC5, RFC3, RFC4, PCNA, LIG1, CCNH, RFC2, XPC, RAD23A, GTF2H4, POLD3, ERCC3, POLD1, ERCC1, POLE2, POLD2, POLE3, ERCC5, POLE	1852	47	6879	1.50155	1	0.412789	0.386382
KEGG_PATHWAY	hsa04062:Chemokine signaling pathway	61	1.26793	0.0584579	GSK3B, ITK, CXCL9, CXCL8, NCF1, ARRB1, CXCL13, CXCL14, IKBKB, GNGT1, PREX1, CCR7, HRAS, MAP2K1, PLCB4, ADCY9, RAF1, SOS1, CCL14, CX3CR1, CCL13, SHC2, SRC, ADCY4, GNAI3, CXCR6, PIK3R1, ADCY1, ADCY7, NRAS, GNG2, CCL8, GRK5, CCL7, GRK4, GNG4, CXCR3, CCL5, GNG7, GRK6, MAPK1, MAPK3, CCR1, LYN, STAT5B, CCL20, STAT1, STAT3, BRAF, GNG12, GNG11, NFKB1, PTK2, CXCL10, CXCL11, CXCL12, GNB4, KRAS, GRB2, GNB5,…	1852	186	6879	1.21815	1	0.412789	0.386382
KEGG_PATHWAY	hsa05205:Proteoglycans in cancer	65	1.35107	0.0603542	ITGB5, HSPB2, FGF2, ELK1, TNF, ACTB, IGF1R, CTSL, CASP3, TIMP3, ITGAV, HRAS, MAP2K1, ARHGEF12, MMP2, WNT5A, PLAUR, ANK2, FRS2, MMP9, DCN, ARHGEF1, RAF1, PPP1R12B, SOS1, CAMK2B, SRC, TWIST2, ITPR1, ITPR2, ITPR3, PIK3R1, SLC9A1, NRAS, WNT11, ERBB3, GPC3, DROSHA, MAPK1, FLNB, FLNC, PLCG1, EIF4B, MAPK3, FZD1, WNT10A, FZD4, LUM, CAV1, STAT3, FZD9, IGF2, FZD8, MSN, BRAF, IGF1, ESR1, PTK2, PPP1CA, VEGFA…	1852	200	6879	1.20717	1	0.412789	0.386382
KEGG_PATHWAY	hsa04915:Estrogen signaling pathway	35	0.727499	0.061154	SHC2, HSP90AB1, CALML5, SRC, ADCY4, GNAI3, ITPR1, ITPR2, CALML3, ITPR3, ADCY1, PIK3R1, ADCY7, HSP90B1, NRAS, CREB3L4, GPER1, MAPK1, HRAS, MAPK3, GABBR2, JUN, MAP2K1, MMP2, HSPA2, FOS, MMP9, ESR1, PLCB4, ADCY9, GNAS, GRB2, KRAS, RAF1, SOS1	1852	99	6879	1.31316	1	0.412789	0.386382
KEGG_PATHWAY	hsa04614:Renin-angiotensin system	11	0.228643	0.0639679	CTSA, CPA3, ACE2, NLN, ATP6AP2, AGTR1, PREP, CTSG, PRCP, LNPEP, THOP1	1852	23	6879	1.77643	1	0.416821	0.390156
KEGG_PATHWAY	hsa00030:Pentose phosphate pathway	13	0.270214	0.0645582	PRPS2, GPI, G6PD, H6PD, TALDO1, PGD, RPIA, PFKL, IDNK, TKT, FBP1, RBKS, PFKP	1852	29	6879	1.66506	1	0.416821	0.390156
KEGG_PATHWAY	hsa04666:Fc gamma R-mediated phagocytosis	30	0.623571	0.0746246	NCF1, ARPC1B, ARPC1A, ASAP3, ARPC5L, ASAP1, ASAP2, PIK3R1, MAPK1, PLCG1, FCGR1A, MAPK3, LYN, VASP, MARCKSL1, MAP2K1, GSN, SYK, MYO10, SPHK2, PRKCE, LIMK2, SPHK1, LIMK1, ARPC2, RPS6KB2, AMPH, RAF1, PLPP3, PLPP1	1852	84	6879	1.32656	1	0.468401	0.438436
KEGG_PATHWAY	hsa04150:mTOR signaling pathway	22	0.457285	0.0757011	IRS1, PTEN, BRAF, TSC1, PIK3R1, IGF1, TNF, RPTOR, IKBKB, RRAGA, RRAGC, RRAGB, RHEB, RPS6KA2, RRAGD, DDIT4, RPS6KB2, EIF4EBP1, MAPK1, EIF4E2, EIF4B, MAPK3	1852	58	6879	1.4089	1	0.468401	0.438436
KEGG_PATHWAY	hsa04912:GnRH signaling pathway	32	0.665142	0.0785039	CAMK2B, CALML5, SRC, ADCY4, ITPR1, ITPR2, CALML3, ITPR3, CACNA1C, ADCY1, CACNA1F, ELK1, ADCY7, NRAS, MAPK1, MAP2K7, HRAS, MAPK3, MAP2K3, MAP2K4, JUN, MAP2K1, MAP3K1, MMP2, PLCB4, ADCY9, JMJD7-PLA2G4B, GNAS, GRB2, KRAS, RAF1, SOS1	1852	91	6879	1.30615	1	0.47583	0.44539
KEGG_PATHWAY	hsa05110:Vibrio cholerae infection	20	0.415714	0.0813833	SLC12A2, ATP6V0B, ARF1, ATP6V1G2, ACTB, PDIA4, SEC61A2, TJP1, SEC61A1, ADCY9, SEC61G, ATP6V0A2, GNAS, KDELR2, ATP6V0A4, PLCG1, ATP6V1D, TJP2, ATP6V1F, ATP6V1C2	1852	52	6879	1.4286	1	0.483417	0.452491
KEGG_PATHWAY	hsa05222:Small cell lung cancer	30	0.623571	0.0852097	RB1, CDKN1B, LAMA2, LAMA4, LAMA3, PTEN, PIK3R1, CKS1B, IKBKB, RXRA, E2F2, E2F3, ITGAV, SKP2, LAMB2, ITGA3, TRAF2, PTK2, NFKB1, TRAF4, CCNE2, CCNE1, TRAF3, CDK4, TRAF5, CDK2, COL4A6, CKS2, BCL2, COL4A5	1852	85	6879	1.31095	1	0.496221	0.464477
KEGG_PATHWAY	hsa05220:Chronic myeloid leukemia	26	0.540428	0.0877312	RB1, SHC2, HDAC2, CDKN1B, PIK3R1, IKBKB, NRAS, MECOM, E2F2, MAPK1, E2F3, HRAS, MAPK3, STAT5B, MAP2K1, TGFB3, CDKN2A, BRAF, NFKB1, TGFBR2, RUNX1, CDK4, GRB2, KRAS, RAF1, SOS1	1852	72	6879	1.3413	1	0.50108	0.469024
KEGG_PATHWAY	hsa03010:Ribosome	45	0.935356	0.0904071	MRPS17, MRPS15, RPL3, MRPS14, MRPL18, RPL34, RPL10L, MRPS12, MRPL16, MRPL17, RPS27L, MRPL36, MRPL14, MRPL15, MRPL12, RPL8, MRPL13, MRPL35, RPL6, MRPL11, MRPL4, RPS4X, MRPL3, MRPL2, RPS19, RPL36AL, RPL13, MRPL9, RPL15, RPS10, RPS9, RPL22, MRPS18A, MRPS2, RPL23A, MRPS7, MRPS5, MRPL21, MRPS9, RPS29, RPL26, RPL29, RPS21, RSL24D1, RPS24	1852	136	6879	1.22902	1	0.504803	0.472509
KEGG_PATHWAY	hsa00380:Tryptophan metabolism	16	0.332571	0.093482	DDC, AOC1, MAOA, AADAT, ACAT2, ACAT1, ACMSD, ALDH3A2, TDO2, KYNU, AFMID, CAT, KYAT3, AOX1, IDO1, ALDH9A1	1852	40	6879	1.48575	1	0.504803	0.472509
KEGG_PATHWAY	hsa00620:Pyruvate metabolism	16	0.332571	0.093482	PDHA1, MDH1, MDH2, ACYP2, PDHB, ACACB, ACAT2, ACAT1, ALDH3A2, LDHB, LDHA, LDHD, ME1, ME3, ME2, ALDH9A1	1852	40	6879	1.48575	1	0.504803	0.472509
